# Supplementary material for: Morphologic development of the first-trimester utero-placental vasculature is positively associated with embryonic and fetal growth: the Rotterdam Periconception Cohort
Source: PubMed Central journal article supplement — Hum Reprod. 2024 Mar 19;39(5):923–35. doi: 10.1093/humrep/deae056 (PMC11063559; doi:10.1093/humrep/deae056), 2024-03-19
Supplement: deae056_supplementary_table_s1.pdf [file deae056_supplementary_table_s1.pdf]

Supplementary Table S1. Characteristics of study population.

| Characteristic                              | Total Cohort<br>(n = 214)<br>Mean (SD);<br>n (%) | Natural <sup>a</sup><br>(n = 127)<br>Mean (SD);<br>n (%) | IVF/ICSI<br>(n = 87)<br>Mean (SD);<br>n (%) | P-value <sup>b</sup> |
|---------------------------------------------|--------------------------------------------------|----------------------------------------------------------|---------------------------------------------|----------------------|
| <i>Maternal</i>                             |                                                  |                                                          |                                             |                      |
| Age (years)                                 | 32.3 (4.5)                                       | 31.8 (4.4)                                               | 33.0 (4.6)                                  | 0.586                |
| Nulliparous                                 | 115 (53.7.4%)                                    | 68 (53.5%)                                               | 47 (54.0%)                                  | 0.945                |
| Gestational age (GA) at first visit (days)  | 58 (7)                                           | 59 (7)                                                   | 57 (7)                                      | 0.910                |
| Geographic origin                           |                                                  |                                                          |                                             |                      |
| Dutch                                       | 166 (77.6%)                                      | 95 (74.8%)                                               | 71 (81.6%)                                  | 0.735                |
| Western other                               | 6 (2.8%)                                         | 4 (3.1%)                                                 | 2 (2.3%)                                    |                      |
| Non-Western                                 | 38 (17.8%)                                       | 24 (18.9%)                                               | 14 (16.1%)                                  |                      |
| Educational level                           |                                                  |                                                          |                                             |                      |
| Low                                         | 18 (8.4%)                                        | 10 (7.9%)                                                | 8 (9.2%)                                    | 0.702                |
| Intermediate                                | 69 (32.2%)                                       | 38 (29.0%)                                               | 31 (35.6%)                                  |                      |
| High                                        | 123 (57.5%)                                      | 75 (59.1%)                                               | 48 (55.2%)                                  |                      |
| BMI first trimester (kg/m <sup>2</sup> )    | 25.9 (5.2)                                       | 26.6 (5.7)                                               | 24.9 (4.1)                                  | <b>0.030</b>         |
| Folic acid supplement use (yes)             | 210 (98.1%)                                      | 123 (96.9%)                                              | 87 (100%)                                   | 0.095                |
| Preconception initiation (yes)              | 178 (83.6%)                                      | 93 (73.8%)                                               | 85 (97.7%)                                  | <b>&lt;0.001</b>     |
| Alcohol consumption (yes)                   | 57 (26.6%)                                       | 34 (26.8%)                                               | 23 (26.4%)                                  | 0.799                |
| Smoking (yes)                               | 28 (13.1%)                                       | 16 (12.6%)                                               | 12 (13.8%)                                  | 0.816                |
| <i>Prenatal growth</i>                      |                                                  |                                                          |                                             |                      |
| Crown rump length (mm)                      |                                                  |                                                          |                                             |                      |
| 7 weeks GA                                  | 13.04 (2.69)                                     | 13.28 (2.91)                                             | 12.77 (2.49)                                | 0.385                |
| 9 weeks GA                                  | 26.12 (3.51)                                     | 25.84 (3.77)                                             | 26.59 (3.04)                                | 0.206                |
| 11 weeks GA                                 | 48.35 (6.27)                                     | 47.62 (7.22)                                             | 49.41 (4.17)                                | 0.064                |
| Embryonic volume (cm <sup>3</sup> )         |                                                  |                                                          |                                             |                      |
| 7 weeks GA                                  | 0.36 (0.28)                                      | 0.40 (0.35)                                              | 0.32 (0.19)                                 | 0.203                |
| 9 weeks GA                                  | 2.24 (0.82)                                      | 2.20 (0.89)                                              | 2.34 (0.70)                                 | 0.354                |
| 11 weeks GA                                 | 10.15 (3.32)                                     | 9.73 (3.58)                                              | 10.73 (2.74)                                | 0.076                |
| Estimated fetal weight (g)                  |                                                  |                                                          |                                             |                      |
| 22 weeks GA                                 | 542 (73)                                         | 539 (73)                                                 | 546 (73)                                    | 0.404                |
| 32 weeks GA                                 | 2050 (226)                                       | 2044 (224)                                               | 2048 (228)                                  | 0.932                |
| <i>Maternal pregnancy complications</i>     |                                                  |                                                          |                                             |                      |
| Pregnancy-induced hypertension <sup>c</sup> | 9 (4.2%)                                         | 6 (4.7%)                                                 | 3 (3.4%)                                    | 0.648                |
| Preeclampsia <sup>c</sup>                   | 7 (3.3%)                                         | 4 (3.1%)                                                 | 3 (3.4%)                                    | 0.904                |
| <i>Neonatal outcomes</i>                    |                                                  |                                                          |                                             |                      |
| GA at birth, days                           | 267 (30)                                         | 264 (34)                                                 | 272 (20)                                    | 0.063                |
| Birth weight, grams                         | 3177 (690)                                       | 3139 (735)                                               | 3237 (615)                                  | 0.266                |
| Birth weight percentiles                    | 46.2 (29.0)                                      | 46.0 (30.0)                                              | 46.9 (28.3)                                 | 0.935                |
| Fetal sex, boys                             | 106 (49.5%)                                      | 68 (53.5)                                                | 38 (43.7%)                                  | 0.282                |
| Congenital anomalies                        | 8 (3.7%)                                         | 5 (3.9%)                                                 | 3 (3.4%)                                    | 0.853                |
| Placenta-related complication <sup>b</sup>  | 54 (25.2%)                                       | 37(29.1%)                                                | 17 (19.5%)                                  | 0.089                |
| Fetal growth restriction <sup>b</sup>       | 15 (7.0%)                                        | 11 (8.7%)                                                | 4 (4.6%)                                    | 0.253                |
| Small-for-gestational age <sup>b</sup>      | 19 (8.9%)                                        | 16 (12.6%)                                               | 3 (3.4%)                                    | <b>0.021</b>         |
| Preterm birth <sup>b,d</sup>                | 23 (10.7%)                                       | 16 (12.6%)                                               | 7 (8.0%)                                    | 0.291                |

<sup>a</sup> Including eight women who received mild ovarian stimulation.

<sup>b</sup> Bold text indicates significance at P-value ≤ 0.05.

<sup>c</sup> Some women had more than one diagnosis.

<sup>d</sup> Including both spontaneous and iatrogenic.
