# Supplementary material for: Morphologic development of the first-trimester utero-placental vasculature is positively associated with embryonic and fetal growth: the Rotterdam Periconception Cohort
Source: PubMed Central journal article supplement — Hum Reprod. 2024 Mar 19;39(5):923–35. doi: 10.1093/humrep/deae056 (PMC11063559; doi:10.1093/humrep/deae056), 2024-03-19
Supplement: deae056_supplementary_table_s2.pdf [file deae056_supplementary_table_s2.pdf]

**Supplementary Table S2.** First-trimester absolute morphologic development of utero-placental vascular skeleton (uPVS).

| Morphologic characteristic | Gestational age (weeks) |                         |                          | P-value <sup>a</sup> |
|----------------------------|-------------------------|-------------------------|--------------------------|----------------------|
|                            | 7<br>n = 94             | 9<br>n = 170            | 11<br>n = 130            |                      |
| uPVS endpoints (n)         | 633.0 (405.5; 1022.0)   | 1314.0 (960.2; 1703.2)  | 1866.0 (1331; 2318)      | <0.0001              |
| uPVS bifurcation point (n) | 352.0 (176.2; 616.5)    | 844.5.0 (457; 1297.8)   | 1134.0 (770; 1676)       | <0.0001              |
| uPVS crossing point (n)    | 89.5 (33; 181.5)        | 305.5 (141.0; 474.0)    | 459.0 (305; 768)         | <0.0001              |
| uPVS vessel point (n)      | 2327.0 (1184; 3886)     | 5010.0 (2778; 7965)     | 7297.0 (4631; 9594)      | <0.0001              |
| Total length (mm)          | 1756.5 (990.3; 3256.1)  | 5077.5 (3193.8; 6930.4) | 7681.9 (5110.7; 10938.0) | <0.0001              |
| Average thickness (mm)     | 1.107 (0.981; 1.218)    | 1.297 (1.172; 1.403)    | 1.432 (1.322; 1.548)     | <0.0001              |

Values are median (quartile1; quartile 3).

<sup>a</sup> Assessed with a maximum likelihood test.
