# Supplementary material for: Morphologic development of the first-trimester utero-placental vasculature is positively associated with embryonic and fetal growth: the Rotterdam Periconception Cohort
Source: PubMed Central journal article supplement — Hum Reprod. 2024 Mar 19;39(5):923–35. doi: 10.1093/humrep/deae056 (PMC11063559; doi:10.1093/humrep/deae056), 2024-03-19
Supplement: deae056_supplementary_table_s3.pdf [file deae056_supplementary_table_s3.pdf]

**Supplementary Table S3.** First-trimester density of vascular branching in the utero-placental vascular volume (number of uPVS points per cm<sup>3</sup> uPVV).

| Morphologic characteristic                         | Gestational age (weeks) |                      |                     | P-value <sup>a</sup> |
|----------------------------------------------------|-------------------------|----------------------|---------------------|----------------------|
|                                                    | 7<br>n = 94             | 9<br>n = 170         | 11<br>n = 130       |                      |
| Density of endpoints (n/cm <sup>3</sup> )          | 292.7 (203.7; 450.3)    | 168.2 (114.6; 267.9) | 116.8 (82.7; 169.6) | <0.0001              |
| Density of bifurcation points (n/cm <sup>3</sup> ) | 140.1 (118.6; 179.3)    | 96.8 (78.4; 123.7)   | 75.1 (59.9; 93.0)   | <0.0001              |
| Density of crossing points (n/cm <sup>3</sup> )    | 34.9 (26.1; 51.0)       | 33.5 (23.3; 35.2)    | 29.3 (23.3; 35.2)   | 0.0009               |

<sup>a</sup> Assessed with a maximum likelihood test.
