# Supplementary material for: Morphologic development of the first-trimester utero-placental vasculature is positively associated with embryonic and fetal growth: the Rotterdam Periconception Cohort
Source: PubMed Central journal article supplement — Hum Reprod. 2024 Mar 19;39(5):923–35. doi: 10.1093/humrep/deae056 (PMC11063559; doi:10.1093/humrep/deae056), 2024-03-19
Supplement: deae056_supplementary_table_s4.pdf [file deae056_supplementary_table_s4.pdf]

**Supplementary Table S4.** Associations between first-trimester trajectories of vascular density (number of uPVS points per cm<sup>3</sup> uPVV) and first-trimester trajectories of embryonic growth and development (n = 214).

| Morphologic characteristics                           | Crown rump length (mm)              |                                    | Embryonic volume (cm <sup>3</sup> ) |                           | Carnegie stage (N = 23)  |                          |
|-------------------------------------------------------|-------------------------------------|------------------------------------|-------------------------------------|---------------------------|--------------------------|--------------------------|
|                                                       | N = 200                             |                                    | N = 192                             |                           | N = 152                  |                          |
|                                                       | β [95% CI]                          |                                    | β [95% CI]                          |                           | β [95% CI]               |                          |
|                                                       | Crude                               | Adjusted                           | Crude                               | Adjusted                  | Crude                    | Adjusted                 |
| ln Density of endpoints (n/cm <sup>3</sup> )          | <b>-0.121</b><br>[-0.205; -0.037]** | <b>-0.114</b><br>[-0.203; -0.026]* | <b>-0.044</b><br>[-0.086; -0.003]*  | -0.038<br>[-0.081; 0.005] | 0.474<br>[0.088; 2.556]  | 0.695<br>[0.118; 4.079]  |
| ln Density of bifurcation points (n/cm <sup>3</sup> ) | -0.123<br>[-0.285; 0.039]           | -0.112<br>[-0.292; 0.047]          | -0.045<br>[-0.123; 0.032]           | -0.031<br>[-0.112; 0.049] | 0.996<br>[0.046; 21.617] | 1.368<br>[0.051; 36.683] |
| ln Density of crossing points (n/cm <sup>3</sup> )    | 0.004<br>[-0.186; 0.194]            | -0.003<br>[-0.202; 0.195]          | 0.001<br>[-0.092; 0.094]            | -0.008<br>[-0.088; 0.104] | 1.969<br>[0.057; 67.464] | 1.917<br>[0.080; 46.025] |

Depicted are the crude and adjusted estimates: adjusted for maternal age, parity, conception mode, BMI, smoking, folic acid supplement use, and fetal sex. Carnegie stages (n = 23). uPVS, utero-placental vascular skeleton; uPVV, utero-placental vascular volume. Bold text indicates statistically significant a association. Significance at \* P ≤ 0.05, \*\* P ≤ 0.01.
