# Supplementary material for: Morphologic development of the first-trimester utero-placental vasculature is positively associated with embryonic and fetal growth: the Rotterdam Periconception Cohort
Source: PubMed Central journal article supplement — Hum Reprod. 2024 Mar 19;39(5):923–35. doi: 10.1093/humrep/deae056 (PMC11063559; doi:10.1093/humrep/deae056), 2024-03-19
Supplement: deae056_supplementary_table_s5.pdf [file deae056_supplementary_table_s5.pdf]

**Supplementary Table S5.** Associations between first-trimester trajectories vascular density (number of uPVS points per cm<sup>3</sup> uPVV) and first-trimester trajectories of embryonic growth and development, stratified for conception mode, fetal sex, and occurrence of placenta-related complications.

|                                                       | Crown rump length (mm)             |                                    | Embryonic volume (cm <sup>3</sup> ) |                           | Carnegie stage (N = 23)     |                             |
|-------------------------------------------------------|------------------------------------|------------------------------------|-------------------------------------|---------------------------|-----------------------------|-----------------------------|
|                                                       | Adjusted model                     |                                    | Adjusted model                      |                           | Adjusted model              |                             |
|                                                       | $\beta$ [95% CI]                   |                                    | $\beta$ [95% CI]                    |                           | OR [95% CI]                 |                             |
| <b>Conception method</b>                              |                                    |                                    |                                     |                           |                             |                             |
| <b>Morphologic characteristics</b>                    | IVF/ICSI (n = 81)                  | Natural (n = 117)                  | IVF/ICSI (n = 81)                   | Natural (n = 112)         | IVF/ICSI (n = 77)           | Natural (n = 120)           |
| ln Density of endpoints (n/cm <sup>3</sup> )          | -0.047<br>[-1.732; 0.079]          | <b>-0.152</b><br>[-0.277; -0.028]* | -0.040<br>[-0.092; 0.013]           | -0.037<br>[-0.101; 0.027] | 0.607<br>[0.108; 3.417]     | 0.744<br>[0.062; 9.012]     |
| ln Density of bifurcation points (n/cm <sup>3</sup> ) | -0.077<br>[-0.322; 0.168]          | -0.139<br>[-0.374; 0.096]          | -0.088<br>[-0.189; 0.012]           | -0.004<br>[-0.120; 0.113] | 1.065<br>[0.033; 34.455]    | 2.280<br>[0.036; 144.367]   |
| ln Density of crossing points (n/cm <sup>3</sup> )    | -0.070<br>[-0.339; 0.199]          | 0.023<br>[-0.259; 0.306]           | -0.064<br>[-0.182; 0.055]           | 0.043<br>[-0.096; 0.182]  | 1.972<br>[0.0438; 88.915]   | 3.381<br>[0.015; 777.435]   |
| <b>Fetal sex</b>                                      |                                    |                                    |                                     |                           |                             |                             |
| <b>Morphologic characteristics</b>                    | Male (n = 99)                      | Female (n = 97)                    | Male (n = 97)                       | Female (n = 94)           | Male (n = 102)              | Female (n = 95)             |
| ln Density of endpoints (n/cm <sup>3</sup> )          | <b>-0.145</b><br>[-2.62; -0.029]*  | -104<br>[-0.247; 0.039]            | -0.025<br>[-0.095; 0.044]           | -0.055<br>[-0.113; 0.004] | 0.616<br>[0.097; 3.939]     | 0.379<br>[0.013; 11.17]     |
| ln Density of bifurcation points (n/cm <sup>3</sup> ) | <b>-0.239</b><br>[-0.472; -0.006]  | -0.052<br>[-0.312; 0.207]          | 0.006<br>[-0.127; 0.139]            | -0.068<br>[-0.174; 0.038] | 0.208<br>[0.002; 15.402]    | 6.524<br>[0.023; 1817.385]  |
| ln Density of crossing points (n/cm <sup>3</sup> )    | -0.103<br>[-0.382; 0.177]          | 0.050<br>[-0.246; 0.346]           | 0.049<br>[-0.110; 0.208]            | -0.027<br>[-0.148; 0.095] | 0.087<br>[0.000; 24.044]    | 12.981<br>[0.040; 4233.849] |
| <b>Placenta-related complications</b>                 |                                    |                                    |                                     |                           |                             |                             |
| <b>Morphologic characteristics</b>                    | With (n = 50)                      | Without (n = 148)                  | With (n = 45)                       | Without (n = 148)         | Without (n = 146)           | With (n = 51)               |
| ln Density of endpoints (n/cm <sup>3</sup> )          | <b>-0.230</b><br>[-0.422; -0.037]* | -0.093<br>[-0.196; 0.010]          | -0.044<br>[-0.168; 0.080]           | -0.043<br>[-0.088; 0.002] | 2.089<br>[0.230; 18.959]    | 0.066<br>[0.000; 8.561]     |
| ln Density of bifurcation points (n/cm <sup>3</sup> ) | -0.216<br>[-0.579; 0.147]          | -0.093<br>[-0.294; 0.108]          | 0.015<br>[-0.198; 0.227]            | -0.054<br>[-0.142; 0.034] | 22.998<br>[0.291; 1818.923] | 0.032<br>[0.000; 65.405]    |
| ln Density of crossing points (n/cm <sup>3</sup> )    | -0.066<br>[-0.503; 0.370]          | -0.008<br>[-0.236; 0.220]          | 0.037<br>[-0.223; 0.297]            | -0.001<br>[-0.102; 0.101] | 15.530<br>[0.175; 1379.868] | 0.0121<br>[0.000; 1073.844] |

Depicted are adjusted estimates: adjusted for maternal age, parity, conception mode, BMI, smoking, folic acid supplement use, and fetal sex. Groups stratified for conception mode were not adjusted for conception mode. Groups stratified for fetal sex were not adjusted for fetal sex. Placenta-related complications are specified as PIH or PE and/or FGR, PTB, and SGA; diagnoses may be overlapping. uPVS, utero-placental vascular skeleton; uPVV, utero-placental vascular volume; PIH, pregnancy-induced hypertension; PE, preeclampsia; FGR, fetal growth restriction; PTB, pre-term birth (including both spontaneous and iatrogenic PTB); SGA, small-for-gestational-age. Bold text indicates a statistically significant association. Significance at \*  $P \leq 0.05$ .
