# Supplementary figures and images for: Morphologic development of the first-trimester utero-placental vasculature is positively associated with embryonic and fetal growth: the Rotterdam Periconception Cohort
Source: PubMed Central journal article supplement — Hum Reprod. 2024 Mar 19;39(5):923–35. doi: 10.1093/humrep/deae056 (PMC11063559; doi:10.1093/humrep/deae056), 2024-03-19

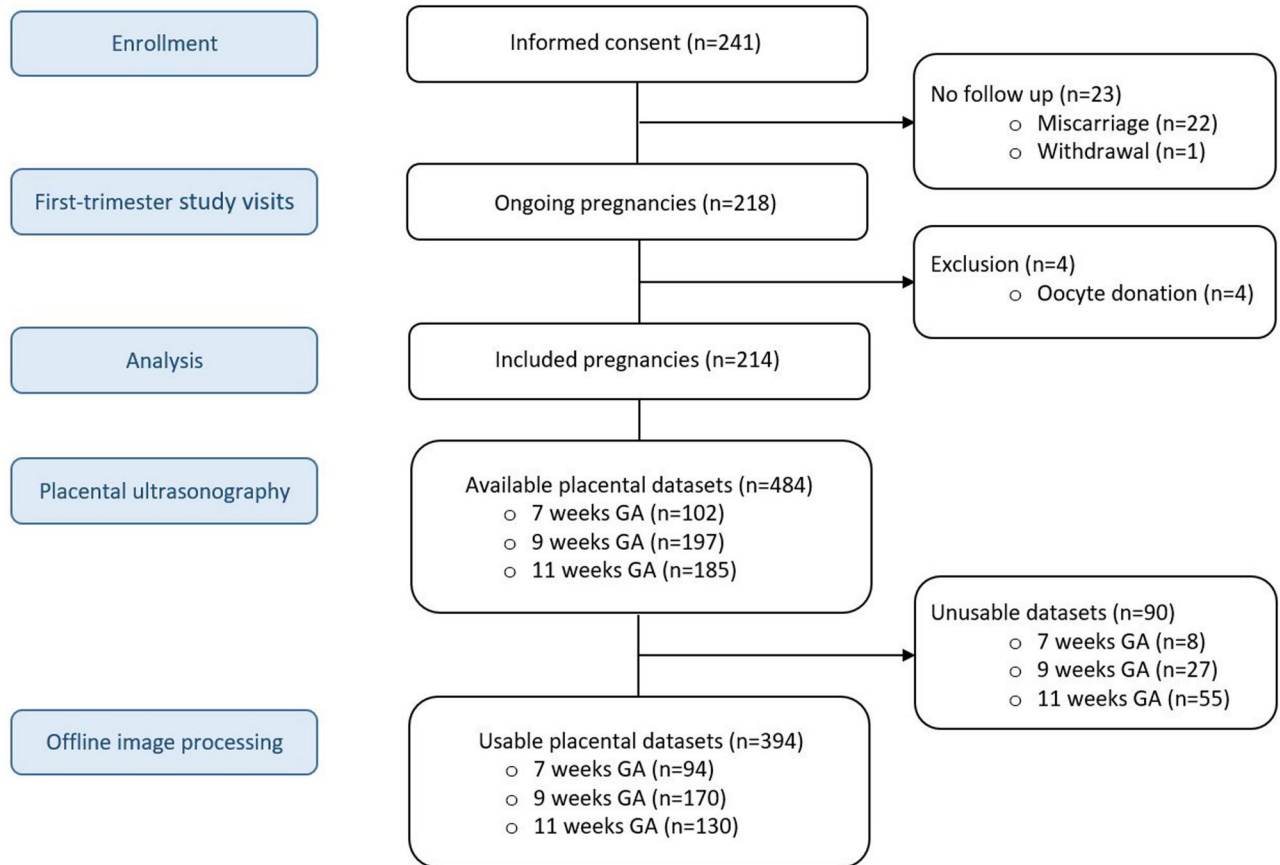

Supplementary Figure S2. Flowchart of participant selection. GA, Gestational age.

Supplement: deae056_supplementary_figure_s2.pdf [file deae056_supplementary_figure_s2.pdf]
